# Supplementary material
Source: PubMed Central journal article supplement (PMC6647051)
Supplement: DC190342SupplementaryData.pdf [file DC190342SupplementaryData.pdf]

## SUPPLEMENTARY DATA

### **Preventing Early Renal Loss in Diabetes (PERL) Study: A Randomized Double-Blinded Trial of Allopurinol—Rationale, Design, and Baseline Data**

Maryam Afkarian<sup>1\*</sup>, Sarit Polsky<sup>2\*</sup>, Afshin Parsa<sup>3</sup>, Ronnie Aronson<sup>4</sup>, Maria Luiza Caramori<sup>5</sup>, David Z. Cherney<sup>6</sup>, Jill P. Crandall<sup>7</sup>, Ian H. de Boer<sup>8</sup>, Thomas G. Elliott<sup>9</sup>, Andrzej T. Galecki<sup>10,11</sup>, Allison B. Goldfine<sup>12</sup>, J. Sonya Haw<sup>13</sup>, Irl B. Hirsch<sup>8</sup>, Amy B. Karger<sup>14</sup>, Ildiko Lingvay<sup>15</sup>, David M. Maahs<sup>16</sup>, Janet B. McGill<sup>17</sup>, Mark E. Molitch<sup>18</sup>, Bruce A. Perkins<sup>19</sup>, Rodica Pop-Busui<sup>20</sup>, Marlon Pragnell<sup>21</sup>, Sylvia E. Rosas<sup>12</sup>, Peter Rossing<sup>22</sup>, Peter Senior<sup>23</sup>, Ronald J. Sigal<sup>24</sup>, Catherine Spino<sup>25</sup>, Katherine R. Tuttle<sup>26</sup>, Guillermo E. Umpierrez<sup>13</sup>, Amisha Wallia<sup>18</sup>, Ruth S. Weinstock<sup>27</sup>, Chunyi Wu<sup>11</sup>, Michael Mauer<sup>5</sup>, and Alessandro Doria<sup>12</sup>, on behalf of the PERL Study Group

\*These authors contributed equally to this paper

<sup>1</sup> Division of Nephrology, Department of Medicine, University of California, Davis, CA

<sup>2</sup> Barbara Davis Center for Diabetes, University of Colorado, Aurora, CO

<sup>3</sup> Division of Kidney, Urologic, and Hematologic Diseases, National Institute of Diabetes and Digestive and Kidney Diseases, Bethesda, MD

<sup>4</sup> LMC Diabetes & Endocrinology, Toronto, Ontario, Canada

<sup>5</sup> Departments of Medicine and Pediatrics, University of Minnesota, Minneapolis, MN

<sup>6</sup> Departments of Medicine and Physiology, University of Toronto, Toronto, Ontario, Canada.

<sup>7</sup> Department of Medicine, Albert Einstein College of Medicine, New York, NY

<sup>8</sup> Department of Medicine, University of Washington, Seattle, WA

<sup>9</sup> BCDiabetes, Vancouver, BC, Canada

<sup>10</sup> Division of Geriatrics, Institute of Gerontology, University of Michigan, Ann Arbor, MI

<sup>11</sup> Department of Biostatistics, School of Public Health, University of Michigan, Ann Arbor, MI

<sup>12</sup> Research Division, Joslin Diabetes Center, and Department of Medicine, Harvard Medical School, Boston, MA

<sup>13</sup> Department of Medicine, Emory University, Atlanta, GA

<sup>14</sup> Department of Laboratory Medicine and Pathology, University of Minnesota, Minneapolis, MN

<sup>15</sup> Department of Medicine and Department of Population and Data Sciences, University of Texas Southwestern Medical Center, Dallas, TX

<sup>16</sup> Department of Pediatrics, Stanford University, Palo Alto, CA

<sup>17</sup> Department of Medicine, Washington University School of Medicine, St. Louis, MO

<sup>18</sup> Division of Endocrinology, Metabolism and Molecular Medicine, Northwestern University Feinberg School of Medicine, Chicago, IL

<sup>19</sup> Lunenfeld-Tanenbaum Research Institute, Mount Sinai Hospital, and Division of Endocrinology and Metabolism, University of Toronto, Toronto, Ontario, Canada

<sup>20</sup> Department of Internal Medicine, Metabolism, Endocrinology and Diabetes, University of Michigan, Ann Arbor, MI

<sup>21</sup> JDRF, New York, NY

<sup>22</sup> Steno Diabetes Center Copenhagen, Gentofte, and Department of Clinical Medicine, University Copenhagen, Copenhagen, Denmark

<sup>23</sup> Department of Medicine, University of Alberta, Edmonton, Alberta, Canada

<sup>24</sup> Departments of Medicine, Cardiac Sciences, and Community Health Sciences, Faculties of Medicine and Kinesiology, University of

## SUPPLEMENTARY DATA

Calgary, Calgary Alberta, Canada

<sup>25</sup>Statistical Analysis of Biomedical and Educational Research (SABER), Department of Biostatistics, School of Public Health, University of Michigan, Ann Arbor, MI

<sup>26</sup>Providence Health Care, Spokane, and Institute of Translational Health Sciences, Kidney Research Institute, and Nephrology Division, University of Washington, Seattle, WA

<sup>27</sup>Department of Medicine, SUNY Upstate Medical University, Syracuse, NY

The full list of the PERL study group is listed in this online supplement material.

SUPPLEMENTARY DATA

**Corresponding authors:**

Alessandro Doria, MPH, MD, PhD  
Section on Genetics and Epidemiology  
Joslin Diabetes Center  
One Joslin Place  
Boston, MA 02215  
Phone: 617.732.2406  
Email: [alessandro.doria@joslin.harvard.edu](mailto:alessandro.doria@joslin.harvard.edu)

Michael Mauer, MD  
Pediatric Nephrology  
6th Floor East Building, MB681,  
2450 Riverside Ave  
Minneapolis, MN 55454  
Phone 612-626-2922  
Email: [mauer002@umn.edu](mailto:mauer002@umn.edu)

## SUPPLEMENTARY DATA

### **PERL Study organization**

The *Data Coordinating Center (DCC)*, based at the University of Michigan, manages all the trial data, monitors enrollment, retention and compliance. DCC also performs regular site visits and collects, monitors, cleans and analyzes data, including adverse events, from all clinical sites.

The *Central Laboratory*, located at the University of Minnesota, is responsible for analyses of the blood and urine laboratory tests sent by each site.

The *PERL Steering Committee* is composed of the study PIs, Drs. Doria and Mauer, directors of all clinical sites, directors of the DCC and the Central Laboratory as well as the NIH and JDRF program officers. The Steering Committee is responsible for the design of the study and its execution.

The external *Data Safety and Monitoring Board (DSMB)*, appointed by the NIH, convenes regularly to provide independent review of the study, assessing the risks to study subjects and monitoring study progress and integrity.

The *Drug Monitoring Committee (DMC)*, consisting of the study PIs, the clinical site directors, the DCC Project Manager, the Lead Clinical Coordinator and a research pharmacist, is co-chaired by two site directors (Drs. Caramori and Rossing), responsible for the oversight of study drug administration as well as RAS blocking and antihypertensive therapy during the trial, convenes regularly to review adverse events and medication side-effects. Both the DSMB and the DMC receive regular reports from the Data Coordination Center and have access to all data relevant to committee needs.

### **PERL Study Group:**

**Principal Investigators**<sup>\*</sup>: Alessandro Doria (Joslin Diabetes Center), Michael Mauer (University of Minnesota)

**Steering Committee**<sup>\*</sup>: Ronnie Aronson (LMC Diabetes), Maria Luiza Caramori (University of Minnesota), Jill P. Crandall (Albert Einstein College of Medicine), Ian H. de Boer (University of Washington), Alessandro Doria (Joslin Diabetes Center), John H. Eckfeldt (University of Minnesota), Thomas G. Elliott (BCDiabetes), Michael Flessner (NIDDK), Andrzej T. Galecki (University of Michigan), Allison B. Goldfine (Joslin Diabetes Center), Irl B. Hirsch (University of Washington), Amy B. Karger (University of Minnesota), Ildiko Lingvay (University of Texas Southwestern Medical Center), David M. Maahs (Stanford University), Michael Mauer (University of Minnesota), Janet B. McGill (Washington University), Mark E. Molitch (Northwestern University), Helen Nickerson (JDRF), Afshin Parsa (NIDDK), Bruce A. Perkins (University of Toronto), Sarit Polsky (Barbara Davis Center for Diabetes), Rodica Pop-Busui (University of Michigan), Marlon Pragnell (JDRF), Sylvia E. Rosas (Joslin Diabetes Center), Peter Rossing (Steno Diabetes Center), Peter Senior (University of Alberta), Ronald J. Sigal (University of Calgary), Catherine Spino (University of Michigan), Katherine R. Tuttle (Providence Health Care, University of Washington), Guillermo E. Umpierrez (Emory University)

**Data Coordinating Center (University of Michigan)**<sup>\*</sup>: Andrzej T. Galecki<sup>†</sup>, Massimo Pietropaolo, Catherine Spino<sup>†</sup>, Yi-Miau Tsai, Chunyi Wu

**Central Laboratory (University of Minnesota)**: John H. Eckfeldt<sup>‡</sup>, Amy B. Karger<sup>†</sup>

**Study Psychologist (University of Minnesota)**: William Robiner

**NIDDK**: Michael Flessner, Afshin Parsa

**JDRF**: Helen Nickerson, Marlon Pragnell

### **Clinical Sites**

Joslin Diabetes Center (Boston, MA)

*Joslin Diabetes Center*: Alessandro Doria<sup>¶</sup>, Allison B. Goldfine<sup>‡</sup>, Sylvia Rosas<sup>†</sup>

*Massachusetts General Hospital*: Enrico Cagliero

*University of Massachusetts*: Michael Thompson

*SUNY Syracuse*: Ruth S. Weinstock

Steno Diabetes Center (Copenhagen, Denmark)

Christina Gjerlev-Poulsen, Maria Lajer, Frederik Persson, Sascha Pilemann-Lyberg, Peter Rossing<sup>†</sup>

University of Minnesota (Minneapolis, MN)

*University of Minnesota*: Maria Luiza Caramori<sup>¶</sup>, Michael Mauer<sup>¶</sup>

## SUPPLEMENTARY DATA

*Gundersen Health System:* Mary Frohauer<sup>†</sup>, San Thida

Barbara Davis Center for Diabetes (Denver, CO)

*Barbara Davis Center for Diabetes:* Peter Gottlieb, David Maahs<sup>‡</sup>, Sarit Polsky<sup>†</sup>, Viral Shah

*Kaiser Permanente Colorado Institute of Health Research (Denver):* Emily Schroeder

*University of Colorado Hospital:* Michael McDermott

University of Michigan (Ann Arbor, MI)

*University of Michigan:* Lynn Ang, Frank C. 3<sup>rd</sup> Brosius, Nazanene H. Esfandiari, Kara Mizokami-Stout, Rodica Pop-Busui<sup>†</sup>

*VA Medical Center Ann Arbor:* Rachel Perlman

*Henry Ford Medical Center:* Arti Bhan, Davida Kruger

Northwestern University (Chicago, IL)

Wenyu Huang, Mark E. Molitch<sup>†</sup>, Amisha Wallia

Albert Einstein College of Medicine (New York, NY)

*Albert Einstein College of Medicine:* Matthew K. Abramowitz, Valentin Anghel, Erika Brutsaert, Jill P. Crandall<sup>†</sup>, Nithya Mani, Divya Rajasekaran

*Icahn School of Medicine at Mount Sinai:* Carol Levy

*Weill Cornell Medical Center:* Melissa Katz, Naina Sinha Gregory

*Winthrop University Hospital:* Nobuyuki Bill Miyawaki, Shayan Shirazian

*Jacobi Hospital:* Ulrich K. Schubart

University of Toronto (Toronto, ON, Canada)

*Mt. Sinai Hospital and University of Toronto:* David Cherney, Bruce A. Perkins<sup>†</sup>

*Women's College Hospital:* Lorraine L. Lipscombe

*St. Michael Hospital:* Andrew Advani

*LMC Diabetes & Endocrinology:* Ronnie Aronson, Ronald Goldenberg

Washington University (St. Louis, MO)

Janet B. McGill<sup>†</sup>, Amy Riek, Maamoun Salam

University of Calgary (Calgary, AL, Canada)

Julie McKeen, Ronald J. Sigal<sup>†</sup>

Alberta Diabetes Institute, University of Alberta (Edmonton, AL, Canada)

Peter Senior<sup>†</sup>, Rose Yeung

Emory University/Grady Health System (Atlanta, GA)

*Emory University/Grady Health System:* J. Sonya Haw, Guillermo E. Umpierrez<sup>†</sup>

*Atlanta Diabetes Associates:* Bruce W. Bode

*Atlanta VA Medical Center:* Darin Olson

University of Washington (Seattle, WA)

*University of Washington Medical Center:* Maryam Afkarian, Ian H. de Boer<sup>†</sup>, Irl B. Hirsch<sup>‡</sup>, Dace L. Trencce

*Virginia Mason Medical Center:* Grace Lee

University of Texas Southwestern University (Dallas, TX)

Ildiko Lingvay<sup>†</sup>

Providence Health Care (Spokane, WA)

Radica Alicic, Katherine R. Tuttle<sup>†</sup>

BCDiabetes (Vancouver, BC, Canada)

Thomas G. Elliott<sup>†</sup>

---

\* Listed alphabetically by last name.

<sup>†</sup> Director of PERL central unit or clinical site

<sup>‡</sup> Former Director of PERL central unit or clinical site

<sup>¶</sup> Overall Study PI's

SUPPLEMENTARY DATA

Supplementary Table S1. Schedule of Events

| Year                                                                                                            | 1      | 1      | 1   | 1   | 1   | 1                      | 1          | 1   | 1   | 1   | 2   | 2  | 2   | 3   | 3   | 3   | 3   | 3        |  |
|-----------------------------------------------------------------------------------------------------------------|--------|--------|-----|-----|-----|------------------------|------------|-----|-----|-----|-----|----|-----|-----|-----|-----|-----|----------|--|
| Week                                                                                                            | -12    | -9     | -7  | -3  |     | 0                      | 4          | 16  | 32  | 48  | 64  | 80 | 96  | 112 | 128 | 142 | 156 | 164      |  |
| Visit #                                                                                                         | 1      | 2      | 3   | 4   | 4a* | 5                      | 6          | 7   | 8   | 9   | 10  | 11 | 12  | 13  | 14  | 15  | 16  | 17       |  |
| ^Type of Visit: In-Person Visit Required (V);<br>Phone Call (C) ; Other Visit (In-Person<br>or Remote Visit, O) | O      | V      | O   | V   | V   | C                      | O          | O   | O   | O   | O   | V  | O   | O   | O   | O   | V   | V        |  |
| EVENT                                                                                                           | Screen | Run-in |     |     |     | Allopurinol or placebo |            |     |     |     |     |    |     |     |     |     |     | Wash-out |  |
|                                                                                                                 |        |        |     |     |     | RANDO<br>100 mg        | 200-400 mg |     |     |     |     |    |     |     |     |     |     |          |  |
| Informed Consent                                                                                                | x      | x      |     |     |     |                        |            |     |     |     |     |    |     |     |     |     |     |          |  |
| Demographics                                                                                                    | x      |        |     |     |     |                        |            |     |     |     |     |    |     |     |     |     |     |          |  |
| Initial Medical Hx                                                                                              |        | x      |     |     |     |                        |            |     |     |     |     |    |     |     |     |     |     |          |  |
| Interval Medical Hx and BP Control Review                                                                       |        |        | x   | x   | (x) |                        | x          | x   | x   | x   | x   | x  | x   | x   | x   | x   | x   | x        |  |
| Concomitant Meds                                                                                                | x      | x      | x   | x   | (x) |                        | x          | x   | x   | x   | x   | x  | x   | x   | x   | x   | x   | x        |  |
| Blood Pressure and Measurements                                                                                 | x      | x      | (x) | x   | (x) |                        | (x)        | (x) | (x) | (x) | (x) | x  | (x) | (x) | (x) | (x) | x   | x        |  |
| ECG Report                                                                                                      |        | x      |     | x   | (x) |                        |            |     |     |     |     | x  |     |     |     |     | x   |          |  |
| Physical Exam                                                                                                   |        | x      |     | (x) | (x) |                        |            |     |     |     |     | x  |     |     |     |     | x   |          |  |
| Skin Assessment                                                                                                 |        |        |     | x   | (x) |                        |            |     |     |     |     | x  |     |     |     |     | x   | x        |  |
| Eligibility                                                                                                     | x      |        |     | x   | (x) | x                      |            |     |     |     |     |    |     |     |     |     |     |          |  |
| Randomization                                                                                                   |        |        |     |     |     | x                      |            |     |     |     |     |    |     |     |     |     |     |          |  |
| Family History                                                                                                  |        |        |     | x   | (x) |                        |            |     |     |     |     |    |     |     |     |     |     |          |  |
| RAS and BP Med Log                                                                                              |        | x      | x   | x   | (x) |                        | x          | x   | x   | x   | x   | x  | x   | x   | x   | x   | x   | x        |  |
| IGFR Procedure                                                                                                  |        |        |     | x   | (x) |                        |            |     |     |     |     | x  |     |     |     |     | x   | x        |  |
| PERL Study Drug Prescription                                                                                    |        |        |     |     |     | x                      | x          | x   | x   | x   | x   | x  | x   | x   | x   | x   |     |          |  |
| Study Drug Compliance                                                                                           |        |        |     |     |     |                        | x          | x   | x   | x   | x   | x  | x   | x   | x   | x   | x   |          |  |
| <b>CENTRAL LAB</b>                                                                                              |        |        |     |     |     |                        |            |     |     |     |     |    |     |     |     |     |     |          |  |
| Serum uric acid, serum creat, cystatin C                                                                        | x      |        | x   | x   | (x) |                        | x          | x   | x   | x   | x   | x  | x   | x   | x   | x   | x   | x        |  |
| Urine ACR/AER                                                                                                   | x      |        | x   | x   | (x) |                        |            | x   |     | x   |     | x  |     | x   |     | x   | x   | x        |  |
| HbA1c                                                                                                           | x      |        |     | x   | (x) |                        |            | x   | x   | x   | x   | x  | x   | x   | x   | x   | x   | x        |  |
| HLA B*58:01                                                                                                     |        |        | x   |     |     |                        |            |     |     |     |     |    |     |     |     |     |     |          |  |
| iGFR                                                                                                            |        |        |     | x   | (x) |                        |            |     |     |     |     | x  |     |     |     |     | x   | x        |  |
| NIDDK Repository: serum, plasma, urine                                                                          |        |        |     | x   |     |                        |            |     |     |     |     | x  |     |     |     |     | x   | x        |  |
| <b>LOCAL LAB</b>                                                                                                |        |        |     |     |     |                        |            |     |     |     |     |    |     |     |     |     |     |          |  |
| Pregnancy test serum HCG                                                                                        | x      |        | x   | x   | (x) |                        | x          | x   | x   | x   | x   | x  | x   | x   | x   | x   | x   | x        |  |
| Pregnancy test urine dipstick                                                                                   |        | x      |     | x   | (x) |                        |            |     |     |     |     | x  |     |     |     |     | x   | x        |  |
| ALT, K, CBC, serum creatinine, urine                                                                            | x      |        | x   | x   | (x) |                        | x          | x   | x   | x   | x   | x  | x   | x   | x   | x   | x   | x        |  |
| Protocol Deviation                                                                                              |        | x      | x   | x   | (x) |                        | x          | x   | x   | x   | x   | x  | x   | x   | x   | x   | x   | x        |  |
| Adverse Events                                                                                                  |        | x      | x   | x   | (x) | x                      | x          | x   | x   | x   | x   | x  | x   | x   | x   | x   | x   | x        |  |

\*If normal blood pressure control is not achieved at Visit 4, the run-in period may be extended for two more weeks after which participants will be examined as in Visit 4 (Visit 4A). In this event, the GFR measurement scheduled for Visit 4 will be conducted at Visit 4A.

^ Study visits will be generally conducted at the Study Sites or their Satellites. "In-Person Visits" (V) are required for Visit 2 and all visits requiring iohexol-GFR measurements. If a participant lives far from a study site or satellite, or travel impediments are present, other (O) visits may be conducted remotely or in-person. For any given study visit to be conducted remotely, a Phone Visit and a Remote Biospecimen Collection will be both required; a Phone Visit is performed by the study coordinator using the telephone or other media such as Skype to collect results of study procedures that do not require physical interactions (e.g., collection of medical history), and a Remote Biospecimen Collection is performed at a clinical laboratory close to where participants live.

Note: (x) indicates an optional assessment.

SUPPLEMENTARY DATA

**Supplementary Table S2.** Rationale for exemptions to eligibility criteria

| <b>Eligibility criterion not met</b>           | <b>N</b> | <b>Reason for granting exemption</b>                                            |
|------------------------------------------------|----------|---------------------------------------------------------------------------------|
| Hemoglobin or platelet count below lower limit | 10       | Deemed safe through consultation with hematologist and/or primary care provider |
| Incomplete type 1 diabetes diagnostic criteria | 6        | Adjudicated as type 1 diabetes by experts in the committee                      |
| BP higher than upper limit                     | 4        | Blood pressure deemed controllable during the trial                             |
| Baseline eGFR outside limits                   | 3        | Less than 1 ml/min/1.73 m <sup>2</sup> outside eligible range                   |
| Time span of albuminuria shorter than 2 years  | 2        | Minimal deviation from 2 years                                                  |
| Time span of eGFR slope shorter than 3 years   | 1        | Minimal deviation from 3 years                                                  |
| History of prostate cancer                     | 1        | Problem considered resolved                                                     |
| History of multiple renal stones               | 1        | Events in distant past                                                          |

Abbreviation: eGFR, estimated glomerular filtration rate

SUPPLEMENTARY DATA

**Supplemental Table S3.** Medication use in PERL participants

| <b>Medication</b>                  | <b>All<br/>(n=530)</b> | <b>Albuminuric<br/>(n=419)</b> | <b>Normoalbuminuric<br/>(n=94)</b> | <b>Indeterminate<br/>(n=17)</b> |
|------------------------------------|------------------------|--------------------------------|------------------------------------|---------------------------------|
| Antihypertensive, N (%)            |                        |                                |                                    |                                 |
| Beta blocker                       | 68 (12.8%)             | 62 (15.0%)                     | 4 (4.3%)                           | 2 (11.8%)                       |
| Calcium channel blocker            | 75 (14.2%)             | 70 (16.7%)                     | 3 (3.2%)                           | 2 (11.8%)                       |
| Loop diuretic                      | 35 (6.6%)              | 34 (8.2%)                      | 1 (1.1%)                           | 0 (0%)                          |
| Thiazide diuretic                  | 59 (11.1%)             | 49 (11.8%)                     | 8 (8.5%)                           | 2 (11.8%)                       |
| Potassium-sparing diuretic         | 3 (0.6%)               | 1 (0.2%)                       | 2 (2.1%)                           | 0 (0%)                          |
| RAAS inhibitor                     | 477 (90%)              | 398 (95%)                      | 70 (74.5%)                         | 9 (52.9%)                       |
| Alpha1 blocker                     | 3 (0.6%)               | 3 (0.7%)                       | 0 (0%)                             | 0 (0%)                          |
| Other                              | 4 (0.8%)               | 4 (1%)                         | 0 (0%)                             | 0 (0%)                          |
| <i>Affect SUA</i>                  |                        |                                |                                    |                                 |
| <i>Losartan alone</i>              | 119 (22.4%)            | 109 (26%)                      | 9 (9.6%)                           | 1 (5.9%)                        |
| <i>Losartan and HCTZ</i>           | 5 (0.9%)               | 5 (1.2%)                       | 0                                  | 0                               |
| <i>HCTZ alone</i>                  | 15 (2.8%)              | 15 (3.6%)                      | 0                                  | 0                               |
| Oral glucose-lowering agent, N (%) | 5 (0.9%)               | 3 (0.7%)                       | 1 (1.0%)                           | 1 (5.9%)                        |
| Metformin                          | 5 (0.9%)               | 3 (0.7%)                       | 2 (2.1%)                           | 0                               |
| SGLT2 inhibitor                    | 7 (1.3%)               | 4 (1.0%)                       | 3 (3.2%)                           | 0                               |
| Lipid lowering, N (%)              |                        |                                |                                    |                                 |
| HMG CoA reductase inhibitor        | 216 (46.2%)            | 185 (49.5%)                    | 25 (31.6%)                         | 6 (28.6%)                       |

The data represents number of participants (percentage) taking each medication.

Abbreviations: HCTZ, hydrochlorothiazide; RAAS, renin-angiotensin-aldosterone-system



SUPPLEMENTARY DATA

**Supplementary Table S4.** Baseline clinical characteristics according to albuminuria and rapid GFR decline.

| Variable                                                             | Albuminuric DKD<br>(No eGFR decline)<br>N=205 | Albuminuric DKD<br>(With eGFR decline)<br>N=174 | P value*  | Normo-albuminuric DKF<br>N=94 | P value <sup>†</sup> |
|----------------------------------------------------------------------|-----------------------------------------------|-------------------------------------------------|-----------|-------------------------------|----------------------|
| Age, years                                                           | 53 (47, 60)                                   | 50 (39, 57)                                     | 0.0008    | 56 (49, 62)                   | <0.0001              |
| Male, N (%)                                                          | 199 (69.8%)                                   | 116 (66.7%)                                     | 0.51      | 54 (57.4%)                    | 0.13                 |
| Race, N (%)                                                          |                                               |                                                 | 0.22      |                               | 0.20                 |
| White                                                                | 177 (86.3%)                                   | 137 (78.7%)                                     |           | 83 (88.3%)                    |                      |
| Black                                                                | 20 (9.8%)                                     | 26 (15.0%)                                      |           | 6 (6.4%)                      |                      |
| Asian                                                                | 1 (0.5%)                                      | 3 (1.7%)                                        |           | 1 (1.1%)                      |                      |
| Other                                                                | 7 (3.4%)                                      | 8 (4.6%)                                        |           | 4 (4.3%)                      |                      |
| Ethnicity, N (%)                                                     |                                               |                                                 | 0.23      |                               | 0.06                 |
| Non-Hispanic                                                         | 196 (95.6%)                                   | 159 (91.4%)                                     |           | 92 (97.9%)                    |                      |
| Hispanic                                                             | 8 (3.9%)                                      | 14 (8.0%)                                       |           | 1 (1.1%)                      |                      |
| Unknown                                                              | 1 (0.5%)                                      | 1 (0.6%)                                        |           | 1 (1.1%)                      |                      |
| Diabetes duration, years                                             | 39 (29, 47)                                   | 30 (21, 40)                                     | <0.0001   | 33 (25, 42)                   | 0.26                 |
| Age at diabetes diagnosis, years                                     | 13 (8, 20)                                    | 15 (9, 26)                                      | 0.03      | 20 (11, 32)                   | 0.005                |
| Hypertension, N (%)                                                  | 201 (98.0%)                                   | 169 (97.1%)                                     | 0.56      | 72 (76.6%)                    | <0.0001              |
| Prior self-reported CVD, N (%)                                       | 47 (24.6%)                                    | 29 (17.4%)                                      | 0.12      | 13 (14.9%)                    | 0.57                 |
| Self-reported diabetic retinopathy, N (%)                            | 150 (77.3%)                                   | 121 (72.9%)                                     | 0.51      | 35 (43.8%)                    | <0.0001              |
| Smoking, N (%)                                                       |                                               |                                                 | 0.28      |                               | 0.06                 |
| Never                                                                | 128 (62.4%)                                   | 99 (56.9%)                                      |           | 67 (71.3%)                    |                      |
| Current                                                              | 25 (12.2%)                                    | 18 (10.3%)                                      |           | 5 (5.3%)                      |                      |
| Past                                                                 | 52 (25.4%)                                    | 57 (32.8%)                                      |           | 22 (23.4%)                    |                      |
| RAS inhibitor use, N (%) <sup>‡</sup>                                |                                               |                                                 | 0.72      |                               | <0.0001              |
| Full dose                                                            | 158 (77.1%)                                   | 135 (77.6%)                                     |           | 49 (52.1%)                    |                      |
| Reduced dose                                                         | 36 (17.5%)                                    | 32 (18.4%)                                      |           | 21 (22.3%)                    |                      |
| Contra-indicated/Not indicated                                       | 9 (4.4%)                                      | 6 (3.4%)                                        |           | 23 (24.5%)                    |                      |
| No RAS inhibitor                                                     | 2 (1.0%)                                      | 1 (0.6%)                                        |           | 1 (1.1%)                      |                      |
| HMG-CoA reductase inhibitors, N (%)                                  | 99 (54.4%)                                    | 74 (46.5%)                                      | 0.15      | 25 (31.6%)                    | 0.03                 |
| BMI, kg/m <sup>2</sup>                                               |                                               |                                                 |           |                               |                      |
| Median (IQR)                                                         | 29 (26, 33)                                   | 29 (25, 34)                                     | 0.98      | 30 (25, 34)                   | 0.62                 |
| 25-29.9 kg/m <sup>2</sup> (overweight), N (%)                        | 77 (38)                                       | 58 (33)                                         | 0.63      | 28 (30)                       | 0.50                 |
| ≥30 kg/m <sup>2</sup> (obese), N (%)                                 | 84 (41)                                       | 71(41)                                          |           | 42 (45)                       |                      |
| Blood pressure – mmHg <sup>‡</sup>                                   |                                               |                                                 |           |                               |                      |
| Systolic                                                             | 127 (118, 138)                                | 129 (113, 139)                                  | 0.92      | 121 (113, 131)                | 0.02                 |
| Diastolic                                                            | 71 (66, 79)                                   | 72 (63, 80)                                     | 0.80      | 69 (63, 76)                   | 0.03                 |
| HbA1c                                                                | 7.9 (7.3, 8.7)                                | 8.5 (7.6, 9.2)                                  | 0.0008    | 7.7 (7.0, 8.5)                | <0.0001              |
| Serum uric acid, mg/dL <sup>‡</sup>                                  | 5.9 (5.1, 7.0)                                | 6.0 (5.1, 7.0)                                  | 0.98      | 5.4 (4.7, 6.2)                | 0.0002               |
| Urine AER (mg/min) <sup>§</sup>                                      |                                               |                                                 |           |                               |                      |
| Median (IQR)                                                         | 65 (21, 222)                                  | 103 (32, 380)                                   | 0.01      | 3 (2, 5)                      | By design            |
| ≤20, N (%)                                                           | 50 (25%)                                      | 24 (14%)                                        |           | 94 (100%)                     |                      |
| 20-199, N (%)                                                        | 94 (46%)                                      | 91 (52%)                                        | 0.03      | 0                             | By design            |
| ≥200, N (%)                                                          | 59 (29%)                                      | 59 (34%)                                        |           | 0                             |                      |
| Historical eGFR slope, mL/min/1.73m <sup>2</sup> /year <sup>  </sup> | 0.2 (-0.7, 2.4)                               | -6.0 (-10, -4)                                  | By design | -4.7 (-6.5, -3.6)             | 0.0009               |
| Baseline eGFR, mL/min/1.73m <sup>2</sup> <sup>‡</sup>                | 73 (56, 88)                                   | 76 (60, 89)                                     | 0.25      | 82 (67, 90)                   | 0.06                 |
| iGFR, mL/min/1.73m <sup>2</sup> <sup>‡</sup>                         | 65 (52, 79)                                   | 67 (55, 78)                                     | 0.43      | 76 (59, 87)                   | 0.0025               |

Data are presented median (IQR) unless otherwise defined, as in Table 2. All other variables are as defined in Table 2.

## SUPPLEMENTARY DATA

Abbreviations: DKD, diabetic kidney disease; DKF, declining kidney function. In the albuminuric DKD group with no eGFR decline, data is missing for 14 participants for prior self-reported CVD, 11 for self-reported diabetic retinopathy, 23 for HMC-CoA reductase inhibitor use, 1 for BMI, 2 for urine AER, and 1 for iGFR. In the albuminuric DKD group with eGFR decline, data is missing for 7 participants in prior self-reported CVD, 8 for self-reported diabetic retinopathy, 15 for HMG-CoA reductase inhibitor use, and 2 for BMI and HbA1c. In the normoalbuminuric DKF group, data is missing for 7 participants for prior self-reported CVD, 14 for self-reported diabetic retinopathy, 15 for HMG-CoA reductase inhibitor use, and 2 for BMI.

P-values relate to the comparison between albuminuric DKD with eGFR decline vs. albuminuric DKD without eGFR decline (\*) or normoalbuminuric DKF vs albuminuric DKD with eGFR decline (†). ‡Obtained during visit 4. §Geometric mean of AERs for visits 3 and 4. ||Obtained during visit 1.

SUPPLEMENTARY DATA

**Supplementary Table S5.** Association between baseline clinical characteristics in the albuminuric and non-albuminuric participants

| Variable         | Univariate, $\beta$ (p-value) |                           |                           |                           | Multivariate, $\beta$ (p-value) |                           |                           |                           |
|------------------|-------------------------------|---------------------------|---------------------------|---------------------------|---------------------------------|---------------------------|---------------------------|---------------------------|
|                  | All                           | Albuminuric DKD           |                           | NDKF                      | All                             | Albuminuric DKD           |                           | NDKF                      |
|                  |                               | All                       | Slope<-3                  |                           |                                 | All                       | Slope<-3                  |                           |
| <b>N</b>         | 530                           | 419                       |                           | 94                        | 530                             | 419                       |                           | 94                        |
| <b>iGFR with</b> |                               |                           |                           |                           |                                 |                           |                           |                           |
| Age              | <b>-0.3 (&lt;0.0001)</b>      | <b>-0.2 (0.002)</b>       | -0.2 (0.11)               | <b>-0.7 (0.0002)</b>      | <b>-0.2 (0.002)</b>             | <b>-0.2 (0.02)</b>        | -0.2 (0.2)                | <b>-0.4 (0.01)</b>        |
| Female           | <b>-7.6 (&lt;0.0001)</b>      | <b>-6.7 (&lt;0.0001)</b>  | <b>-6.1 (0.01)</b>        | <b>-11.0 (0.002)</b>      | <b>-9.9 (&lt;0.0001)</b>        | <b>-8.8 (&lt;0.0001)</b>  | <b>-7.4 (0.002)</b>       | <b>-12.0 (0.0002)</b>     |
| DM Dur           | <b>-0.3 (&lt;0.0001)</b>      | <b>0.2 (0.001)</b>        | <b>-0.1 (0.2)</b>         | <b>-0.6 (0.0001)</b>      | -0.1 (0.09)                     | -0.1 (0.1)                | -0.1 (0.3)                | -0.2 (0.2)                |
| Race             | -1.8 (0.4)                    | -2.2 (0.3)                | -6.2 (0.03)               | 1.0 (0.9)                 | -1.6 (0.4)                      | -1.3 (0.5)                | -3.7 (0.2)                | -5.9 (0.2)                |
| AER              | -1.8 (0.07)                   | -1.8 (0.08)               | -3.4 (0.02)               | -1.7 (0.7)                | <b>-2.7 (0.006)</b>             | <b>-2.7 (0.02)</b>        | <b>-4.2 (0.009)</b>       | 0.3 (0.9)                 |
| SUA              | <b>-4.6 (&lt;0.0001)</b>      | <b>-4.4 (&lt;0.0001)</b>  | <b>-4.9 (&lt;0.0001)</b>  | <b>-5.4 (&lt;0.0001)</b>  | <b>-4.7 (&lt;0.0001)</b>        | <b>-4.6 (&lt;0.0001)</b>  | <b>-4.6 (&lt;0.0001)</b>  | <b>-4.6 (&lt;0.0001)</b>  |
| HbA1c            | <b>-1.5 (0.01)</b>            | <b>-1.2 (0.05)</b>        | <b>-1.9 (0.02)</b>        | -2.8 (0.07)               | <b>-2.0 (0.0003)</b>            | <b>-1.9 (0.003)</b>       | <b>-2.0 (0.02)</b>        | <b>-2.9 (0.02)</b>        |
| SBP              | 0.06 (0.3)                    | 0.04 (0.5)                | 0.07 (0.4)                | 0.1 (0.3)                 | 0.05 (0.4)                      | 0.1 (0.2)                 | 0.2 (0.1)                 | -0.1 (0.3)                |
| DBP              | <b>0.3 (&lt;0.0001)</b>       | <b>0.2 (0.002)</b>        | <b>0.2 (0.03)</b>         | <b>0.8 (&lt;0.0001)</b>   | 0.1 (0.2)                       | 0.06 (0.6)                | 0.05 (0.8)                | 0.5 (0.02)                |
| <b>SUA with</b>  |                               |                           |                           |                           |                                 |                           |                           |                           |
| Age              | 0.005 (0.4)                   | 0.002 (0.8)               | 0.002 (0.9)               | 0.02 (0.12)               | -0.01 (0.1)                     | -0.01 (0.2)               | -0.01 (0.4)               | -0.004 (0.8)              |
| Female           | <b>-0.5 (0.0001)</b>          | <b>-0.5 (0.0007)</b>      | <b>-0.5 (0.02)</b>        | -0.5 (0.07)               | <b>-0.9 (&lt;0.0001)</b>        | <b>-0.8 (&lt;0.0001)</b>  | <b>-0.9 (&lt;0.0001)</b>  | <b>-1.1 (0.0002)</b>      |
| DM Dur           | 0.006 (0.2)                   | 0.0 (0.9)                 | 0.1 (0.8)                 | 0.04 (0.004)              | 0.003 (0.6)                     | -0.003 (0.7)              | -0.009 (0.4)              | 0.02 (0.06)               |
| Race             | 0.3 (0.1)                     | 0.3 (0.1)                 | 0.5 (0.05)                | 0.08 (0.9)                | 0.2 (0.3)                       | 0.2 (0.3)                 | 0.4 (0.1)                 | -0.2 (0.7)                |
| BMI              | <b>0.04 (0.0003)</b>          | <b>0.04 (0.001)</b>       | <b>0.04 (0.01)</b>        | 0.04 (0.1)                | <b>0.03 (0.001)</b>             | <b>0.03 (0.01)</b>        | <b>0.03 (0.05)</b>        | <b>0.04 (0.03)</b>        |
| iGFR             | <b>-0.04 (&lt;0.0001)</b>     | <b>-0.04 (&lt;0.0001)</b> | <b>-0.04 (&lt;0.0001)</b> | <b>-0.03 (&lt;0.0001)</b> | <b>-0.04 (&lt;0.0001)</b>       | <b>-0.05 (&lt;0.0001)</b> | <b>-0.04 (&lt;0.0001)</b> | <b>-0.04 (&lt;0.0001)</b> |
| AER              | <b>0.2 (0.005)</b>            | <b>0.3 (0.005)</b>        | 0.1 (0.4)                 | 0.1 (0.8)                 | 0.1 (0.6)                       | 0.1 (0.5)                 | -0.2 (0.2)                | -0.3 (0.3)                |
| HbA1c            | -0.1 (0.2)                    | -0.1 (0.1)                | -0.04 (0.6)               | 0.1 (0.6)                 | <b>-0.1 (0.03)</b>              | <b>0.1 (0.01)</b>         | -0.1 (0.5)                | -0.03 (0.8)               |
| SBP              | 0.001 (0.9)                   | 0.003 (0.6)               | -0.004 (0.5)              | -0.01 (0.4)               | 0.003 (0.6)                     | 0.01 (0.3)                | 0.01 (0.6)                | -0.01 (0.3)               |
| DBP              | -0.01 (0.3)                   | 0.005 (0.5)               | -0.01 (0.2)               | -0.02 (0.1)               | -0.002 (0.8)                    | -0.01 (0.3)               | -0.01 (0.4)               | 0.02 (0.2)                |
| <b>AER with</b>  |                               |                           |                           |                           |                                 |                           |                           |                           |
| Age              | <b>-0.02 (&lt;0.0001)</b>     | <b>-0.03 (&lt;0.0001)</b> | <b>-0.02 (&lt;0.0001)</b> | <b>-0.02 (0.003)</b>      | <b>-0.01 (0.002)</b>            | <b>-0.02 (0.0001)</b>     | -0.01 (0.1)               | <b>-0.01 (0.02)</b>       |
| Female           | <b>-0.3 (&lt;0.0001)</b>      | <b>-0.3 (&lt;0.0001)</b>  | -0.2 (0.07)               | -0.2 (0.06)               | <b>-0.4 (&lt;0.0001)</b>        | <b>-0.4 (&lt;0.0001)</b>  | <b>-0.4 (0.002)</b>       | -0.2 (0.1)                |
| DM Dur           | <b>-0.01 (&lt;0.0001)</b>     | <b>-0.02 (&lt;0.0001)</b> | <b>-0.02 (&lt;0.0001)</b> | 0.01 (0.2)                | -0.004 (0.2)                    | -0.005 (0.3)              | -0.01 (0.1)               | -0.006 (0.2)              |
| Race             | <b>0.3 (0.001)</b>            | <b>0.4 (0.0006)</b>       | <b>0.3 (0.03)</b>         | -0.06 (0.7)               | 0.07 (0.4)                      | 0.07 (0.5)                | 0.002 (0.99)              | 0.0 (0.99)                |
| iGFR             | -0.004 (0.07)                 | -0.004 (0.08)             | <b>-0.008 (0.02)</b>      | -0.001 (0.7)              | <b>-0.006 (0.006)</b>           | <b>-0.006 (0.02)</b>      | <b>-0.01 (0.01)</b>       | -0.001 (0.9)              |
| SUA              | <b>0.06 (0.005)</b>           | <b>0.08 (0.005)</b>       | 0.03 (0.4)                | 0.01 (0.8)                | 0.02 (0.6)                      | 0.02 (0.5)                | -0.06 (0.2)               | -0.05 (0.3)               |
| HbA1c            | <b>0.2 (&lt;0.0001)</b>       | <b>0.2 (&lt;0.0001)</b>   | <b>0.2 (&lt;0.0001)</b>   | 0.04 (0.3)                | <b>0.1 (&lt;0.0001)</b>         | <b>0.2 (&lt;0.0001)</b>   | <b>0.2 (&lt;0.0001)</b>   | 0.07 (0.2)                |
| SBP              | <b>0.01 (&lt;0.0001)</b>      | <b>0.01 (&lt;0.0001)</b>  | <b>0.01 (0.005)</b>       | 0.0 (0.7)                 | <b>0.01 (0.0004)</b>            | <b>0.01 (0.0002)</b>      | <b>0.02 (0.0006)</b>      | -0.0 (0.8)                |
| DBP              | <b>0.02 (&lt;0.0001)</b>      | <b>0.02 (&lt;0.0001)</b>  | <b>0.02 (&lt;0.0001)</b>  | 0.0 (0.7)                 | 0.03 (0.5)                      | 0.002 (0.8)               | -0.01 (0.4)               | 0.004 (0.6)               |

The univariate linear regression models were run with iGFR (mL/min/1.73m<sup>2</sup>), SUA (mg/dL) or AER (□g/min) as outcome variables and each of the other variables (age and diabetes duration in years, HbA1c in %, SBP and DBP in mmHg) singly added to the model as exposures. Multivariate linear regression models were run with AER, iGFR, or SUA as outcome and all other listed variables as exposures. Each regression analysis was run in the entire randomized group, as well as the subgroups with albuminuric DKD (n=419) and NDKF (n=94). Race was included as a binary variable (white vs. non-white), with the effect estimates referring to non-white vs. white. Albuminuria (AER) values were log transformed to render them more normally distributed. Abbreviations: AER, albumin excretion ratio; DM Dur, type 1 diabetes duration; HbA1c, glycated hemoglobin; iGFR, iohexol glomerular filtration rate; SUA, serum uric acid; SBP, systolic blood pressure; DBP, diastolic blood pressure.

SUPPLEMENTARY DATA

**Supplementary Table S6.** Baseline characteristics of randomized subjects according to sex

| Variable                                                            | Total Cohort<br>(N=530) | Albuminuria status      |                      |                   |                             |                    |                       |
|---------------------------------------------------------------------|-------------------------|-------------------------|----------------------|-------------------|-----------------------------|--------------------|-----------------------|
|                                                                     |                         | Albuminuric DKD (N=419) |                      |                   | Normoalbuminuric DKD (N=94) |                    |                       |
|                                                                     |                         | Female<br>(n=132)       | Male<br>(n=287)      | P-value           | Female<br>(n=40)            | Male<br>(n=54)     | P value <sup>  </sup> |
| Age, years                                                          | 52 (44, 59)             | 53 (42, 59)             | 52 (43, 59)          | 0.77              | 56 (49, 61)                 | 56 (49, 63)        | 0.65                  |
| Race, N (%)                                                         |                         |                         |                      | 0.71              |                             |                    | 0.30                  |
| White                                                               | 446 (84.2)              | 108 (81.8)              | 241 (84.0)           |                   | 37 (92.5)                   | 46 (85.2)          |                       |
| Black                                                               | 58 (10.9)               | 19 (14.4)               | 31 (10.8)            |                   | 1 (2.5)                     | 5 (9.3)            |                       |
| Asian                                                               | 6 (1.1)                 | 1 (0.8)                 | 4 (1.4)              |                   | 1 (2.5)                     | 0                  |                       |
| Other                                                               | 20 (3.8)                | 4 (3.0)                 | 11 (3.8)             |                   | 1 (2.5)                     | 3 (5.6)            |                       |
| Ethnicity, N (%)                                                    |                         |                         |                      | 0.75              |                             |                    | 0.47                  |
| Non-Hispanic                                                        | 504 (95.1)              | 125 (94.7)              | 270 (94.1)           |                   | 40 (100.0)                  | 52 (96.3)          |                       |
| Hispanic                                                            | 23 (4.3)                | 7 (5.3)                 | 15 (5.2)             |                   | 0                           | 1 (1.9)            |                       |
| Unknown                                                             | 3 (0.6)                 | 0                       | 2 (0.7)              |                   | 0                           | 1 (1.9)            |                       |
| Diabetes duration, years                                            | 35 (25, 44)             | <b>38 (27, 47)</b>      | <b>33 (24, 44)</b>   | <b>0.043</b>      | 36 (27, 42)                 | 32 (21, 43)        | 0.47                  |
| Age at diabetes diagnosis, years                                    | 14 (9, 24)              | <b>11 (7, 18)</b>       | <b>14 (9, 23)</b>    | <b>0.035</b>      | 18 (11, 32)                 | 22 (12, 31)        | 0.32                  |
| Hypertension, N (%)                                                 | 491 (92.6)              | 128 (97.0)              | 281 (97.9)           | 0.51              | 31 (77.5)                   | 41 (75.9)          | 0.96                  |
| Prior self-reported CVD, N (%)                                      | 103 (20.6)              | 23 (17.4)               | 62 (21.6)            | 0.54              | 6 (15.0)                    | 7 (13.0)           | 0.77                  |
| Self-reported diabetic retinopathy, N (%)                           | 337 (67.5)              | 87 (65.9)               | 207 (72.1)           | 0.83              | 19 (47.5)                   | 16 (29.6)          | 0.078                 |
| Smoking, N (%)                                                      |                         |                         |                      | 0.17              |                             |                    | 0.98                  |
| Never                                                               | 322 (60.8)              | 85 (64.4)               | 161 (56.1)           |                   | 29 (72.5)                   | 38 (70.4)          |                       |
| Current                                                             | 58 (10.9)               | 11 (8.3)                | 40 (13.9)            |                   | 2 (5.0)                     | 3 (5.6)            |                       |
| Past                                                                | 150 (28.3)              | 36 (27.3)               | 86 (30.0)            |                   | 9 (22.5)                    | 13 (24.1)          |                       |
| RAS inhibitor use, N (%) <sup>†</sup>                               |                         |                         |                      | 0.91              |                             |                    | 0.97                  |
| Full dose                                                           | 375 (70.8)              | 100 (75.8)              | 220 (76.7)           |                   | 20 (50.0)                   | 29 (53.7)          |                       |
| Reduced dose                                                        | 102 (19.3)              | 24 (18.2)               | 54 (18.8)            |                   | 10 (25.0)                   | 11 (20.4)          |                       |
| Contra-indicated/Not indicated                                      | 48 (9.1)                | 7 (5.3)                 | 10 (3.5)             |                   | 10 (25.0)                   | 13 (24.1)          |                       |
| No RAS inhibitor                                                    | 5 (0.9)                 | 1 (0.8)                 | 3 (1.0)              |                   | 0                           | 1 (1.9)            |                       |
| HMG-CoA reductase inhibitors, N (%)                                 | 216 (46.2)              | 61 (46.2)               | 124 (43.2)           | 0.83              | 9 (22.5)                    | 16 (29.6)          | 0.33                  |
| BMI, kg/m <sup>2</sup>                                              | 29 (25, 33)             | 29 (25, 34)             | 29 (26, 33)          | 0.24              | <b>32 (26, 36)</b>          | <b>28 (25, 33)</b> | <b>0.043</b>          |
| Blood pressure, mmHg <sup>†</sup>                                   |                         |                         |                      |                   |                             |                    |                       |
| Systolic                                                            | 127(116, 137)           | 126 (113, 138)          | 129 (118, 138)       | 0.16              | 117 (110, 129)              | 125 (117, 134)     | 0.47                  |
| Diastolic                                                           | 71 (65, 79)             | <b>69 (63, 78)</b>      | <b>72 (66, 81)</b>   | <b>0.017</b>      | 67 (63, 73)                 | 71 (63, 77)        | 0.14                  |
| HbA1c,%                                                             | 8.0 (7.3, 8.8)          | 8.1 (7.5, 9.1)          | 8.1 (7.4, 9.0)       | 0.26              | 8.0 (7.1, 8.7)              | 7.6 (7.0, 8.3)     | 0.51                  |
| Serum uric acid, mg/dL <sup>†</sup>                                 | 5.9 (5.1, 6.9)          | 5.6 (4.9, 6.6)          | 6.2 (5.3, 7.3)       | .0007             | 5.0 (4.4, 5.9)              | 5.5 (5.1, 6.3)     | 0.070                 |
| Urine AER, µg/min <sup>‡</sup>                                      |                         |                         |                      |                   |                             |                    |                       |
| Median (IQR)                                                        | 42 (9, 207)             | <b>45 (17, 174)</b>     | <b>112 (31, 430)</b> | <b>&lt;0.0001</b> | 3 (1, 4)                    | 3 (2, 5)           | 0.17                  |
| <20, N (%)                                                          | 189 (36)                | <b>37 (28.0)</b>        | <b>44 (15.3)</b>     |                   | 40 (100.0)                  | 54 (100.0)         | NA                    |
| 20-199, N (%)                                                       | 203 (38)                | <b>65 (49.2)</b>        | <b>135 (47.0)</b>    | <b>0.0014</b>     |                             |                    |                       |
| >200, N (%)                                                         | 136 (26)                | <b>30 (22.7)</b>        | <b>106 (36.9)</b>    |                   |                             |                    |                       |
| Historical eGFR slope, mL/min/1.73m <sup>2</sup> /year <sup>§</sup> | -3.5 (-5.8, 0)          | -2 (-7, 1)              | -2 (-5, 0)           | 0.30              | -5 (-8, -4)                 | -5 (-6, -4)        | 0.096                 |
| Baseline eGFR, mL/min/1.73m <sup>2†</sup>                           | 76 (59, 90)             | <b>69 (53, 84)</b>      | <b>75 (59, 91)</b>   | <b>0.025</b>      | <b>72 (62, 88)</b>          | <b>85 (78, 92)</b> | <b>0.012</b>          |
| iGFR, mL/min/1.73m <sup>2†</sup>                                    | 68 (55, 80)             | <b>61 (51, 72)</b>      | <b>70 (55, 80)</b>   | <b>&lt;0.0001</b> | <b>64 (53, 81)</b>          | <b>79 (71, 89)</b> | <b>0.0024</b>         |

## SUPPLEMENTARY DATA

Continuous variables are presented as median (interquartile range, IQR). Categorical variables are presented as count (percent). Missing data is as detailed in supplemental Table S3. \*In race, 'other' is a combination of American Indian or Alaskan Native, Native Hawaiian or Other Pacific Islander, multi-race, unknown or unreported. †Obtained during visit 4. ‡Geometric mean of AERs for visits 3 and 4. §Obtained during visit 4. ¶P-values refer to the comparison between men and women in each category.
